# Supplementary material for: Characterizing precipitation and soil moisture drydowns in Finland using SMAP satellite data
Source: Copernicus journal article supplement (doi:10.5194/egusphere-2025-245), 2025-02-17
Supplement: Supplementary file 1 [file egusphere-2025-245-supplement.pdf]

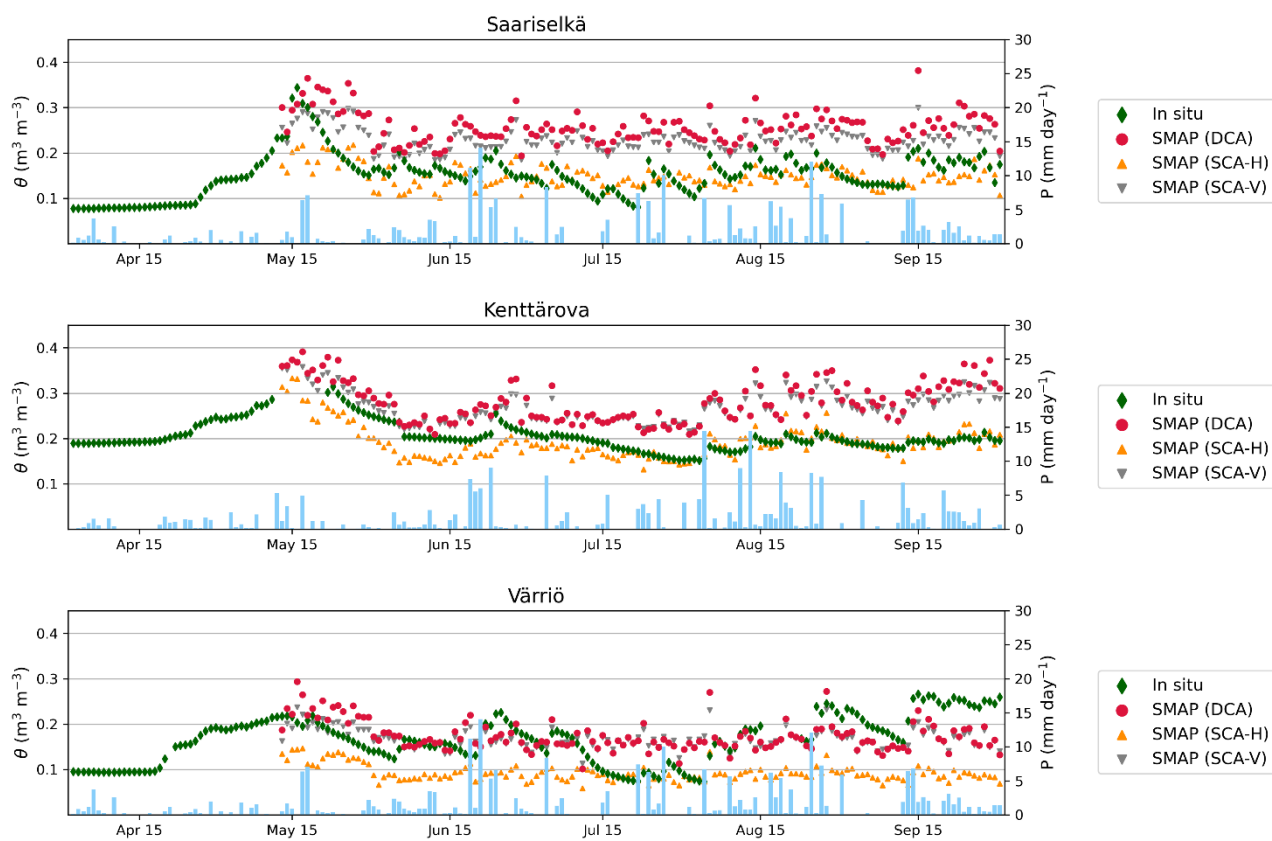

**Figure S1. Timeseries of SM and radar-based P measurements in Saariselkä, Kenttäröva, and Värriö.**

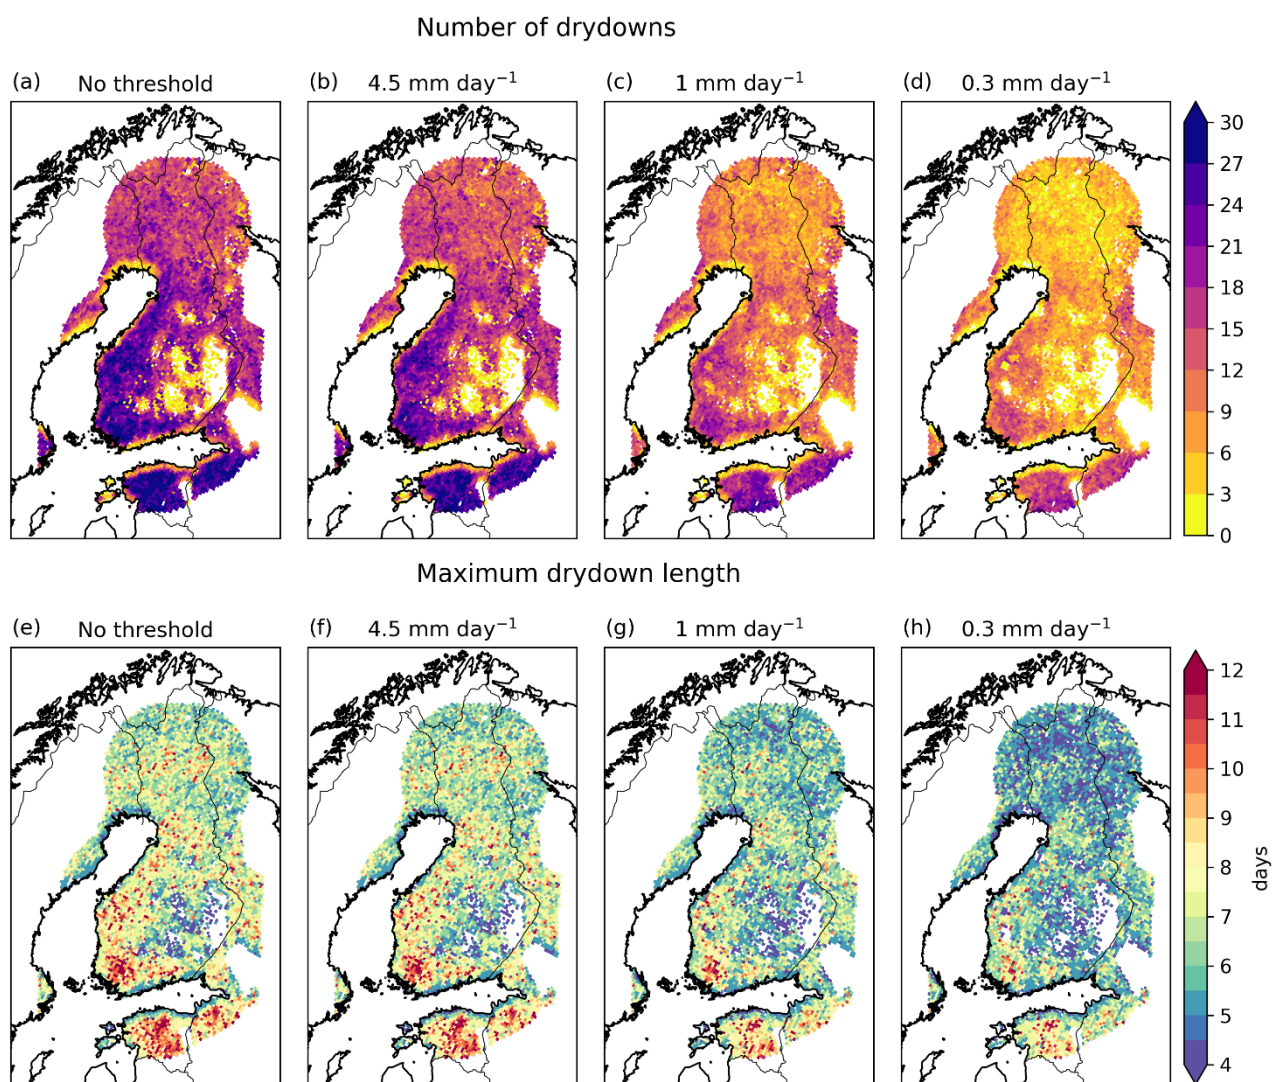

**Figure S2.** The number of drydowns and the maximum drydown length using different P thresholds when identifying drydowns.
